# Supplementary material for: Structure Elucidation of Fucan Sulfate from Sea Cucumber Holothuria fuscopunctata through a Bottom-Up Strategy and the Antioxidant Activity Analysis
Source: MDPI journal article supplement (doi:10.3390/ijms23094488), 2022-04-19
Supplement: s1 [file s1]

***Supplementary Material***

**Structure elucidation of fucan sulfate from sea cucumber  
*Holothuria fuscopunctata* through a bottom-up strategy and  
the antioxidant activity analysis**

Li Gao<sup>1</sup>, Chen Xu<sup>1</sup>, Xuelin Tao<sup>1</sup>, Zhichuang Zuo<sup>1</sup>, Zimo Ning<sup>1</sup>, Linghui Wang<sup>1</sup>,

Na Gao<sup>1,2,\*</sup>, Jinhua Zhao<sup>1,\*</sup>

<sup>1</sup> School of Pharmaceutical Sciences, South-Central University for Nationalities,  
Wuhan, 430074, China

<sup>2</sup> National Demonstration Center for Experimental Ethnopharmacology Education,  
South-Central University for Nationalities, Wuhan 430074, China

\* Corresponding authors. E-mail address: gn2008.happy@163.com (Na Gao),  
zhao.jinhua@yahoo.com (Jinhua Zhao)

### **Preparation of dFSI' by peroxide depolymerization**

The depolymerized FSI (dFSI') were prepared using a modified protocol based on the previous report ([Shang et al., 2018](#)). In brief, 100 mg of FSI was dissolved in 4 mL of H<sub>2</sub>O, 3.0 mg of copper acetate and 1 mL of 30% H<sub>2</sub>O<sub>2</sub> solution was added and stirred at 35 °C for 3 h. Finally, the solution was precipitated with 2 mL of saturated sodium chloride solution and ethanol with a final concentration of 80% (v/v) and collected by centrifugation (4000 × g, 15 min). Then, the precipitate was dissolved, desalted by Sephadex G-25, concentrated and lyophilized to yield depolymerized product dFSI'. The average molecular weight of dFSI' was detected on a Shodex OHpak SB-804 HQ column and calculated as 4.6 kDa.

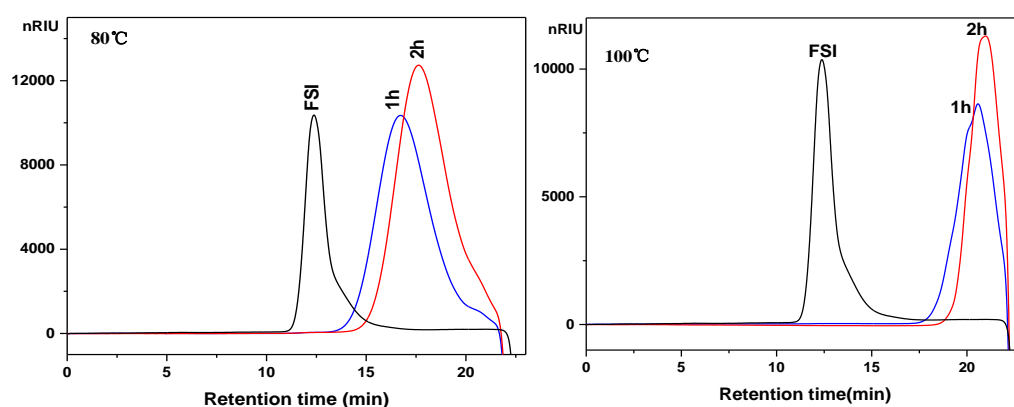

**Figure S1.** HPGPC profiles of acid hydrolysis hydrolysates of FSI at 80°C and 100°C, respectively.

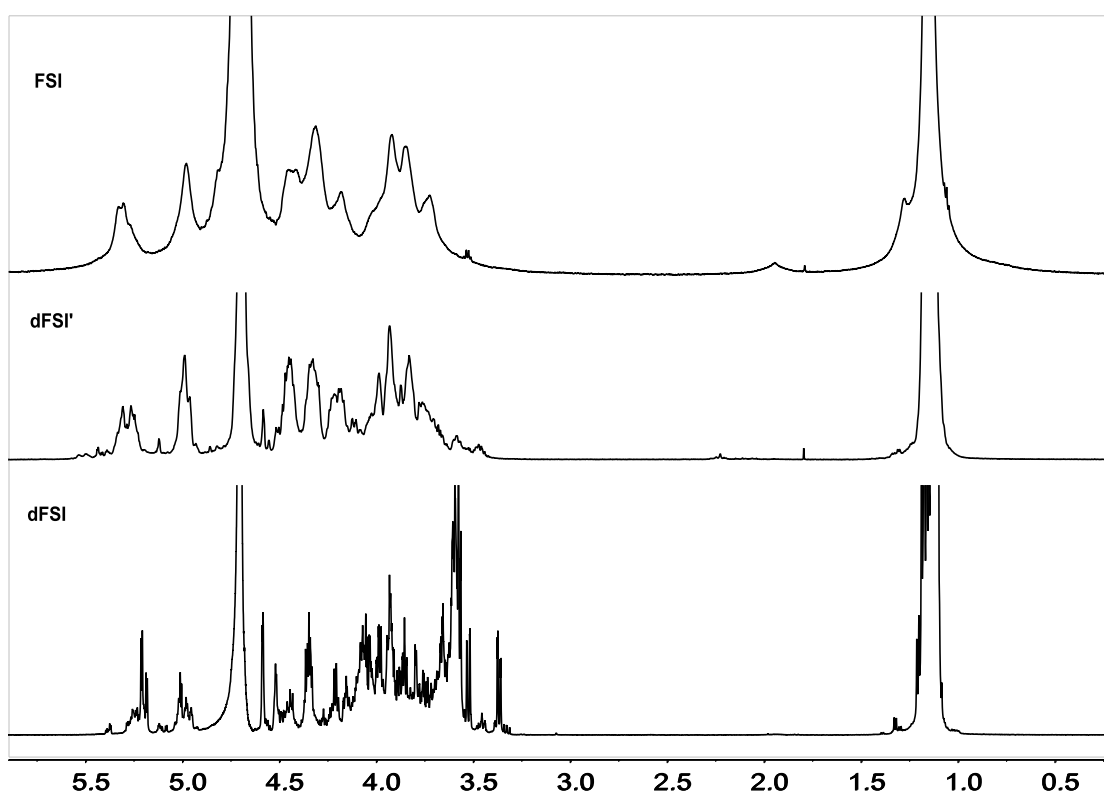

**Figure S2.**  $^1\text{H}$  NMR spectra of native FSI from *H. fuscopunctata*, dFSI' obtained by peroxide depolymerization and dFSI obtained by mild acid hydrolysis.

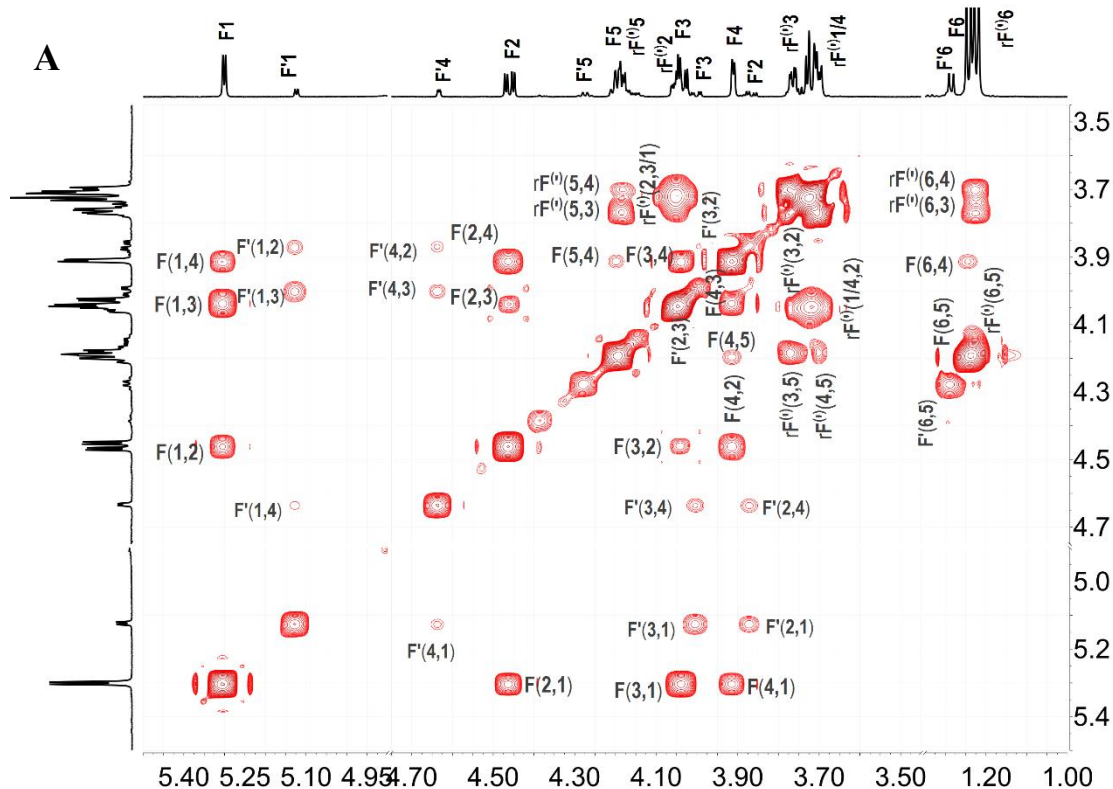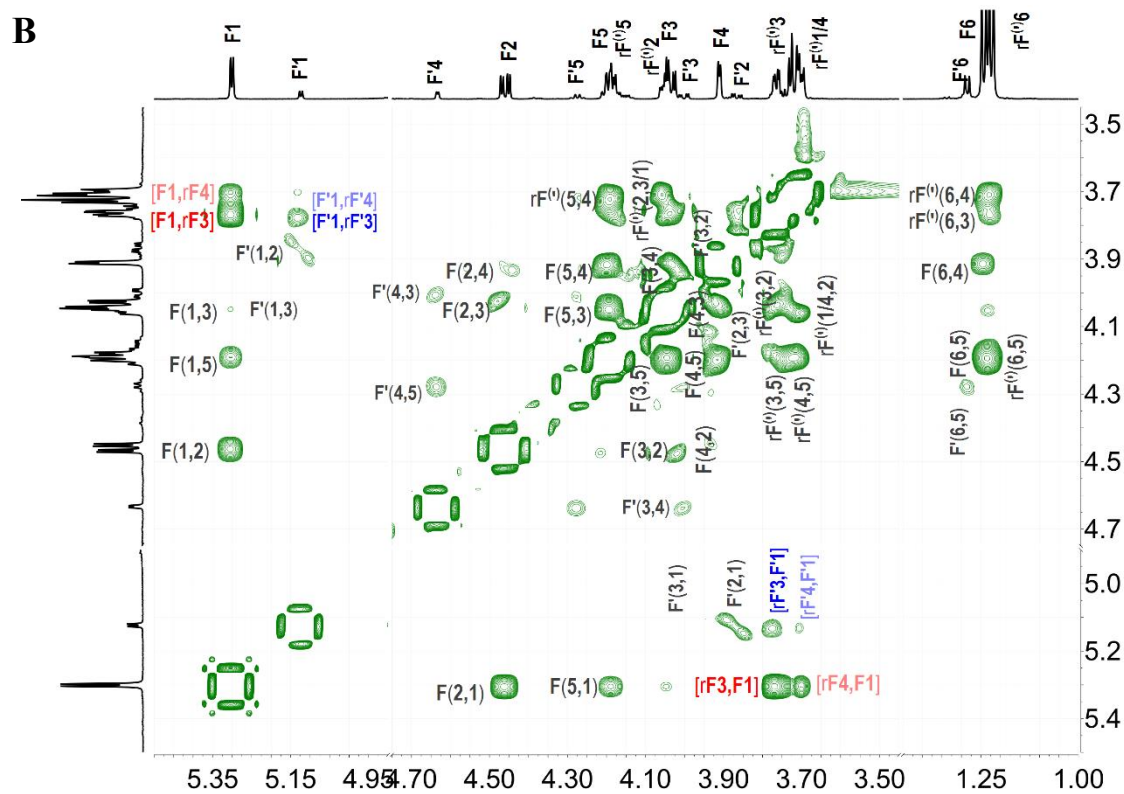

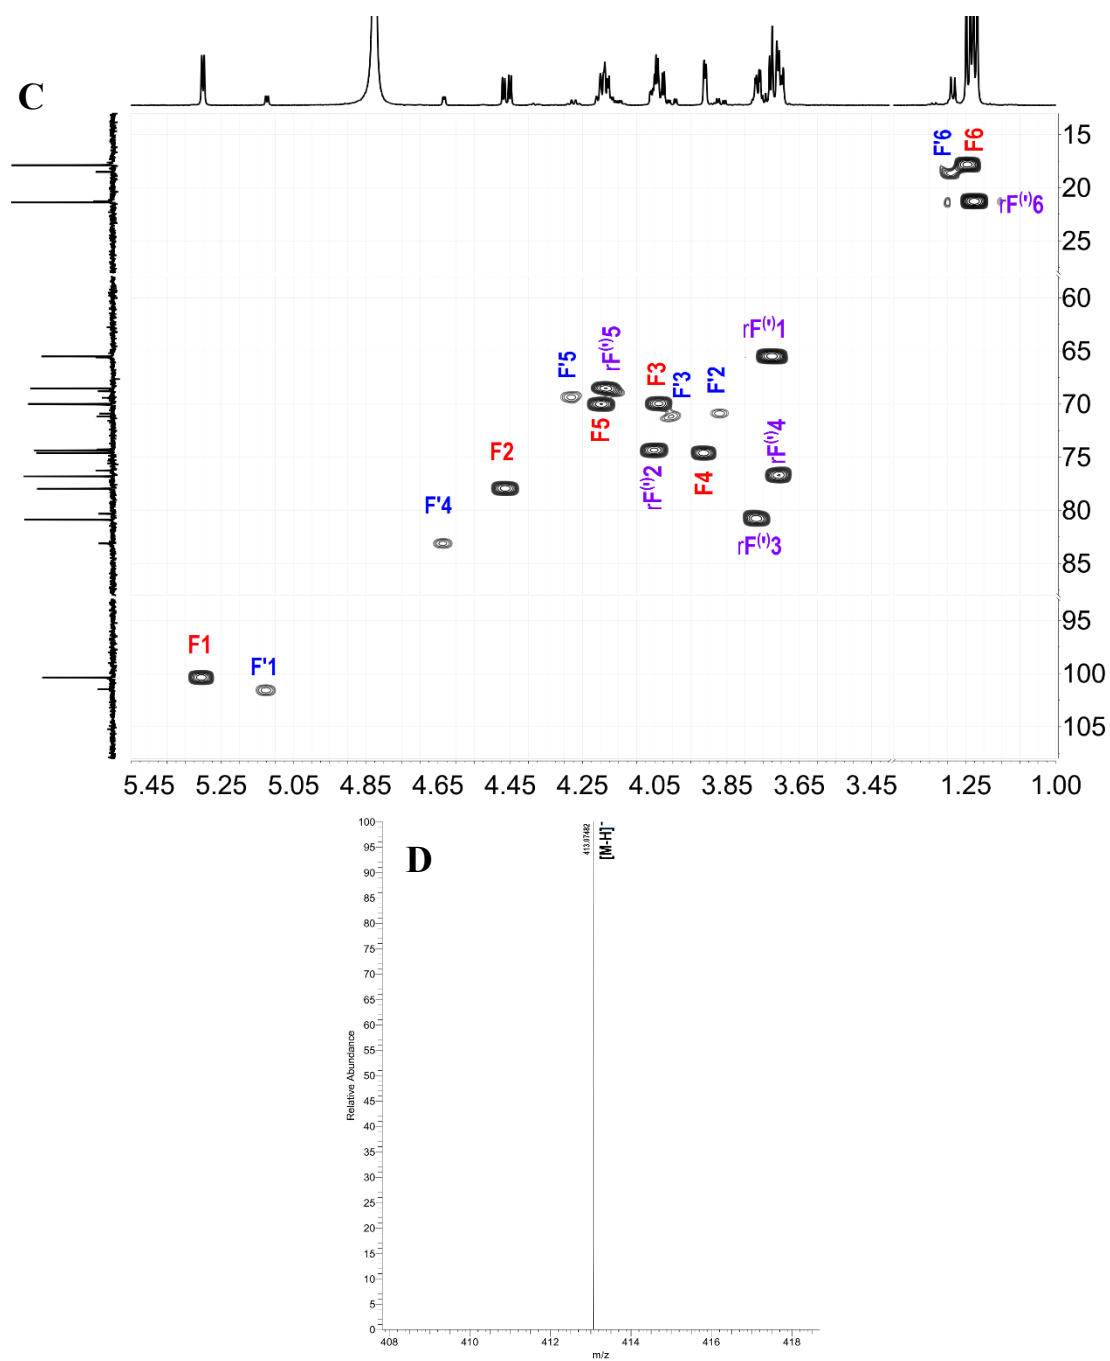

**Figure S3.**  $^1\text{H}$ - $^1\text{H}$  TOCSY (A),  $^1\text{H}$ - $^1\text{H}$  ROESY (B),  $^{13}\text{C}$ - $^1\text{H}$  HSQC (C) spectra of **FI** and its MS spectrum (D).

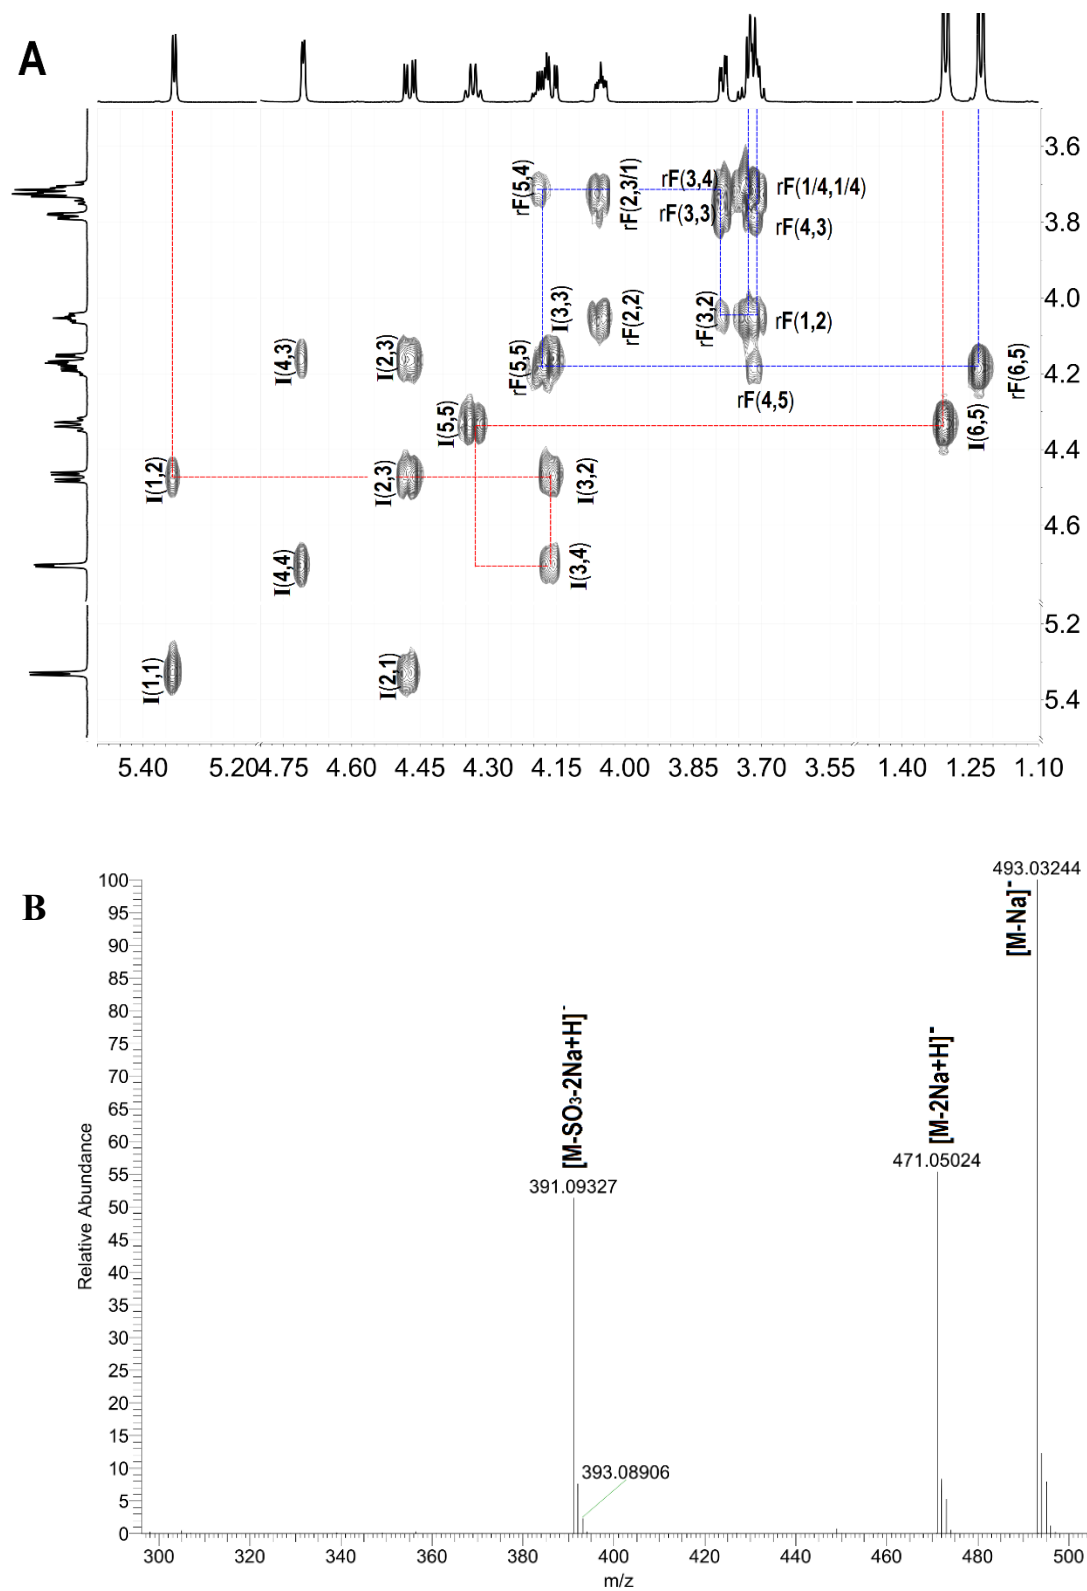

**Figure S4.**  $^1\text{H}$ - $^1\text{H}$  COSY (A) spectrum of **FII** and its MS spectrum (B).

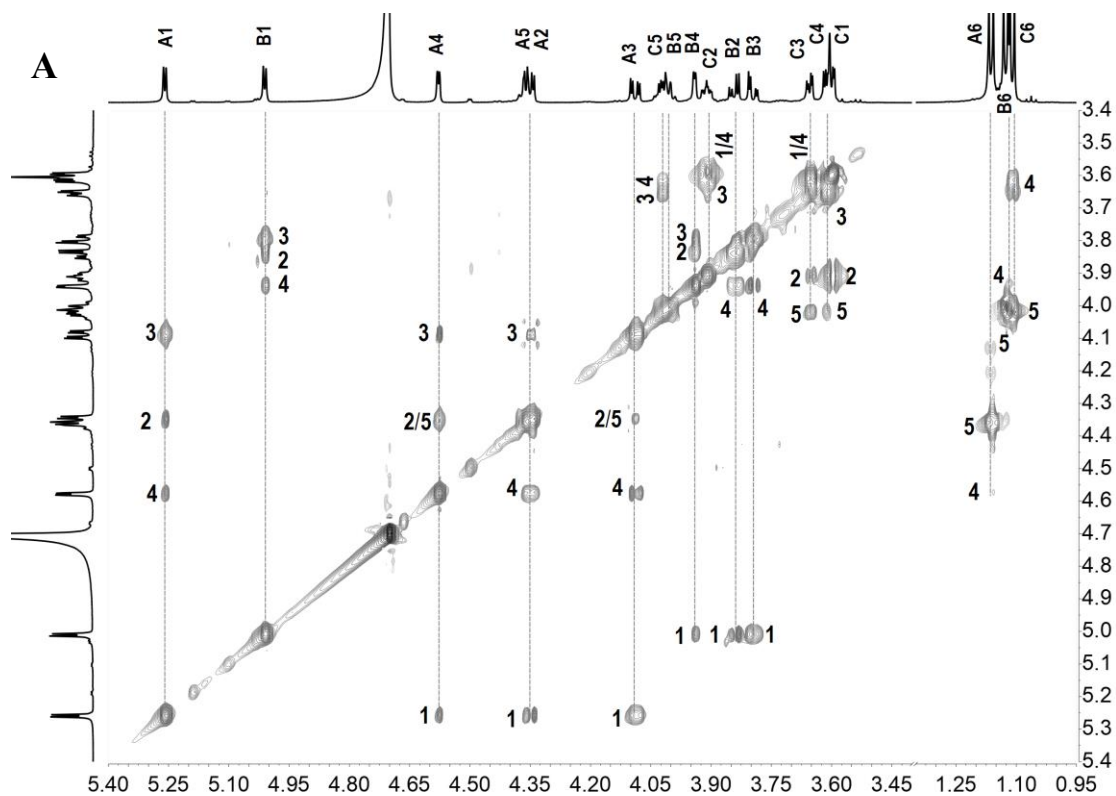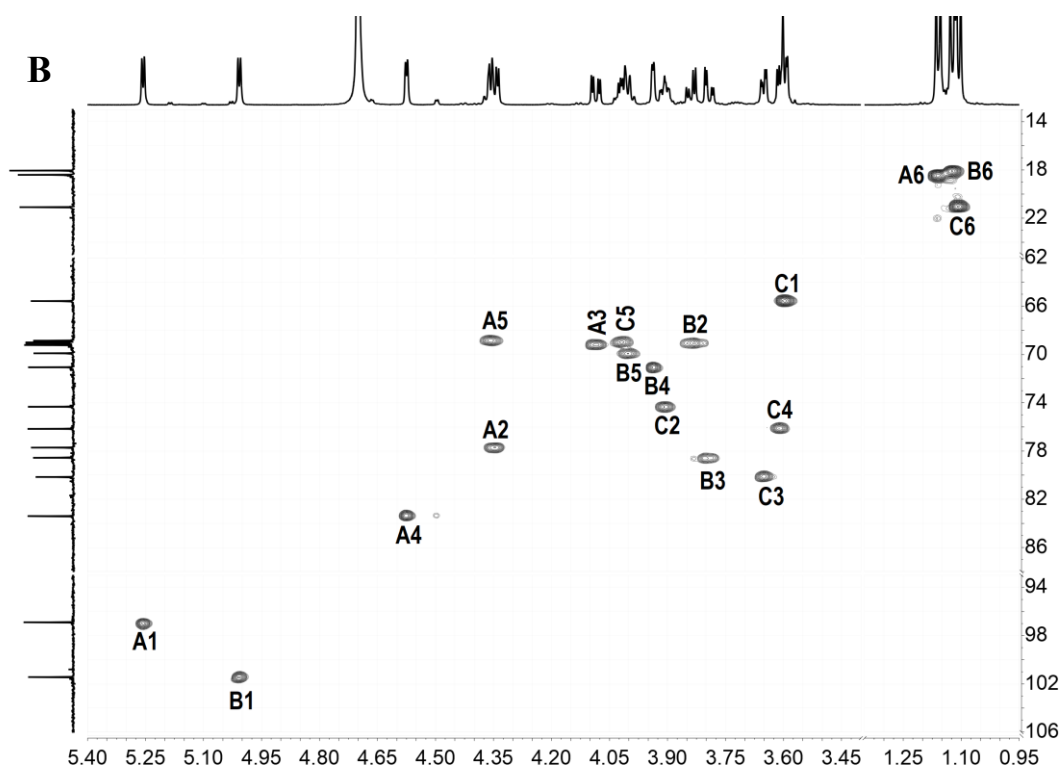

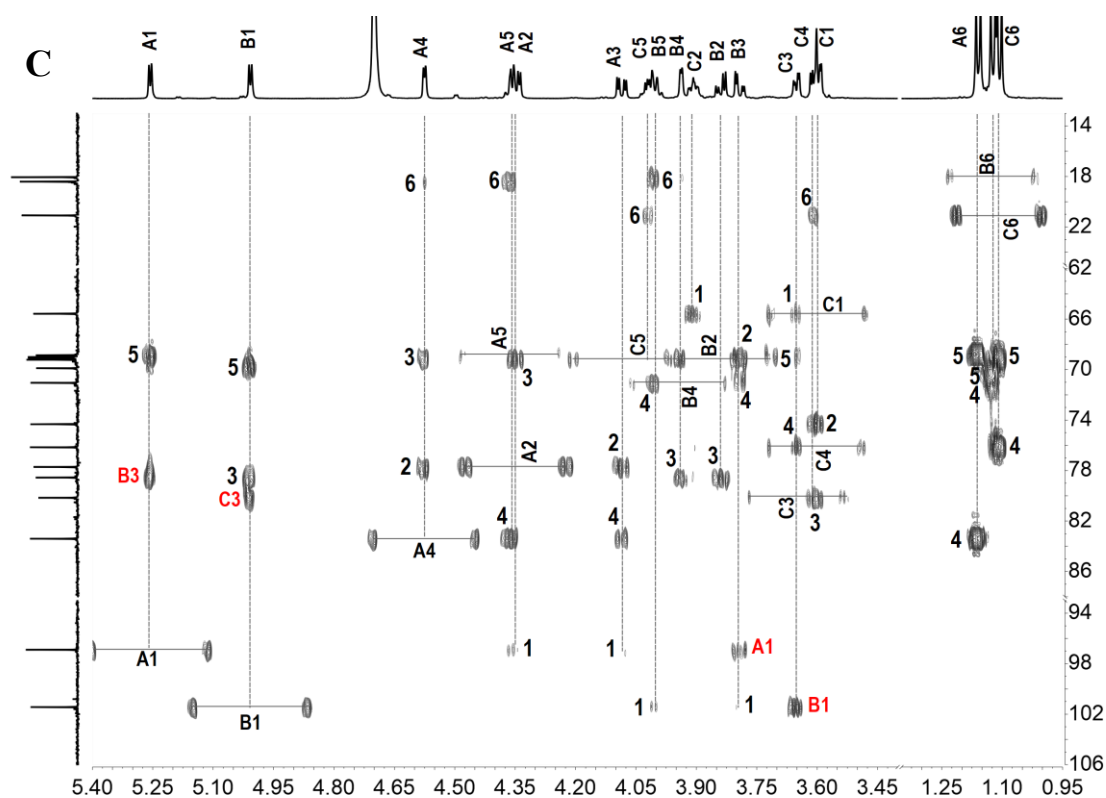

**Figure S5.**  $^1\text{H}$ - $^1\text{H}$  TOCSY (A),  $^1\text{H}$ - $^{13}\text{C}$  HSQC (B) and  $^1\text{H}$ - $^{13}\text{C}$  HMBC (C) spectra of **III**.

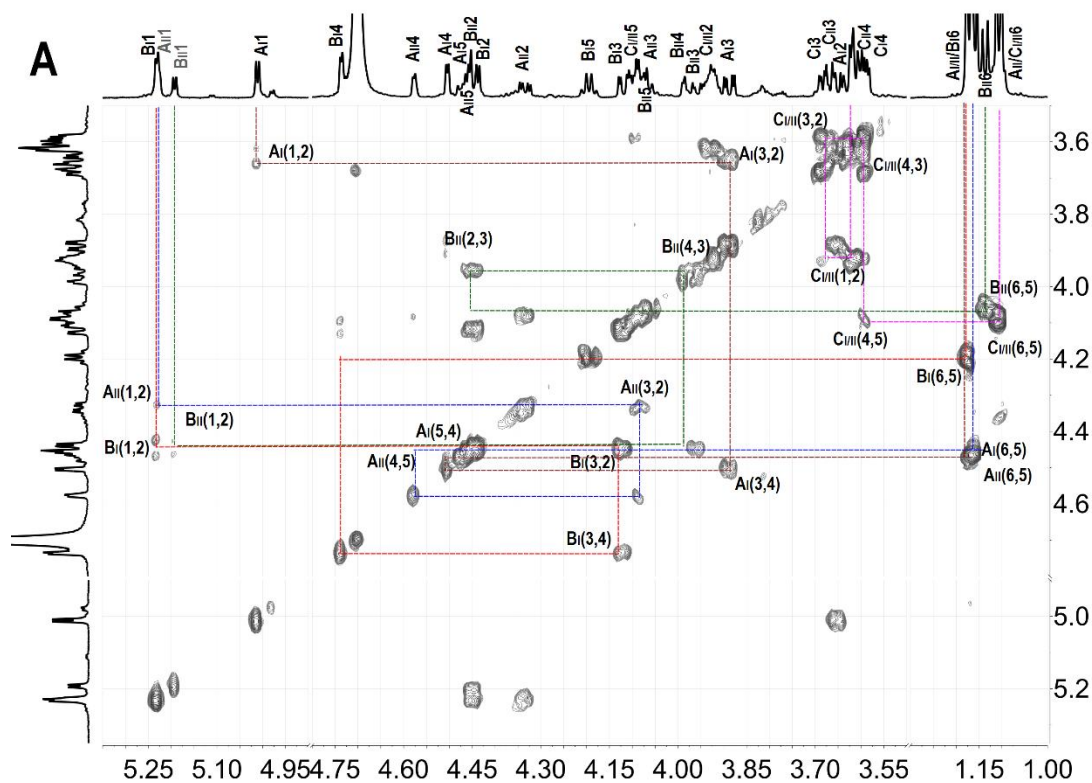



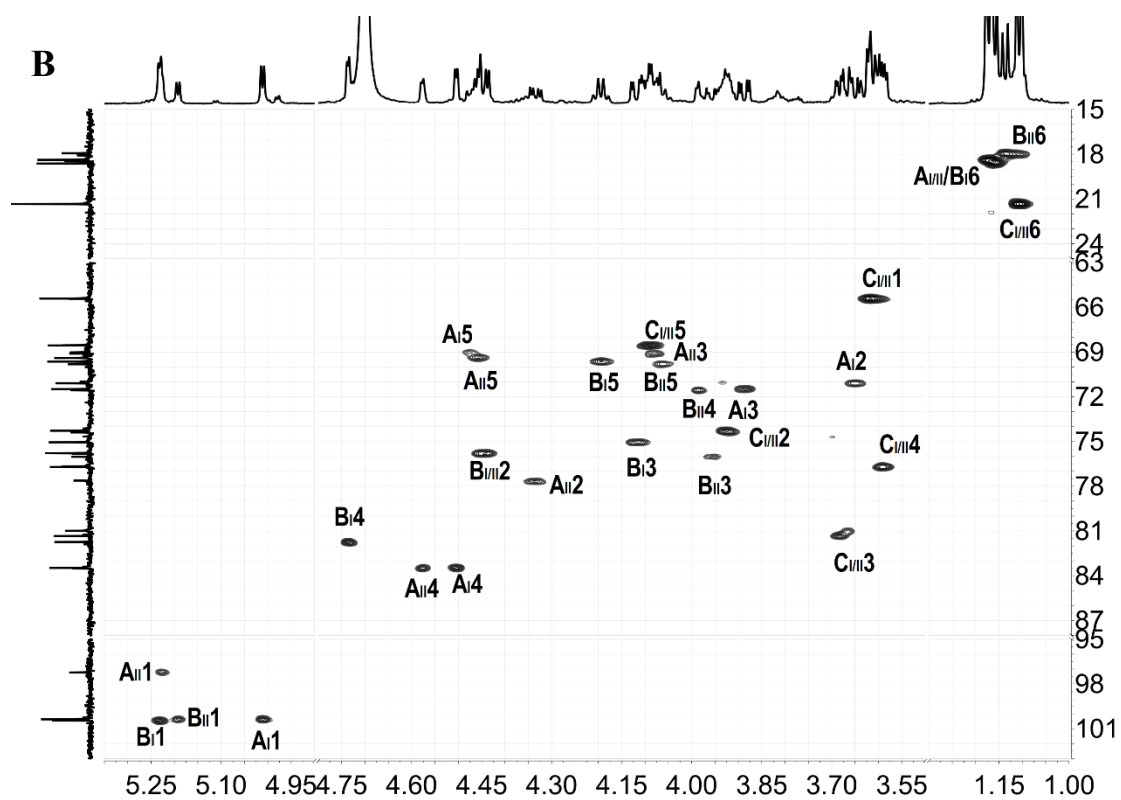

**Figure S6.** The  $^1\text{H}$ - $^1\text{H}$  COSY (A) and  $^1\text{H}$ - $^{13}\text{C}$  HSQC (B) spectra of oligosaccharides **FIV**.

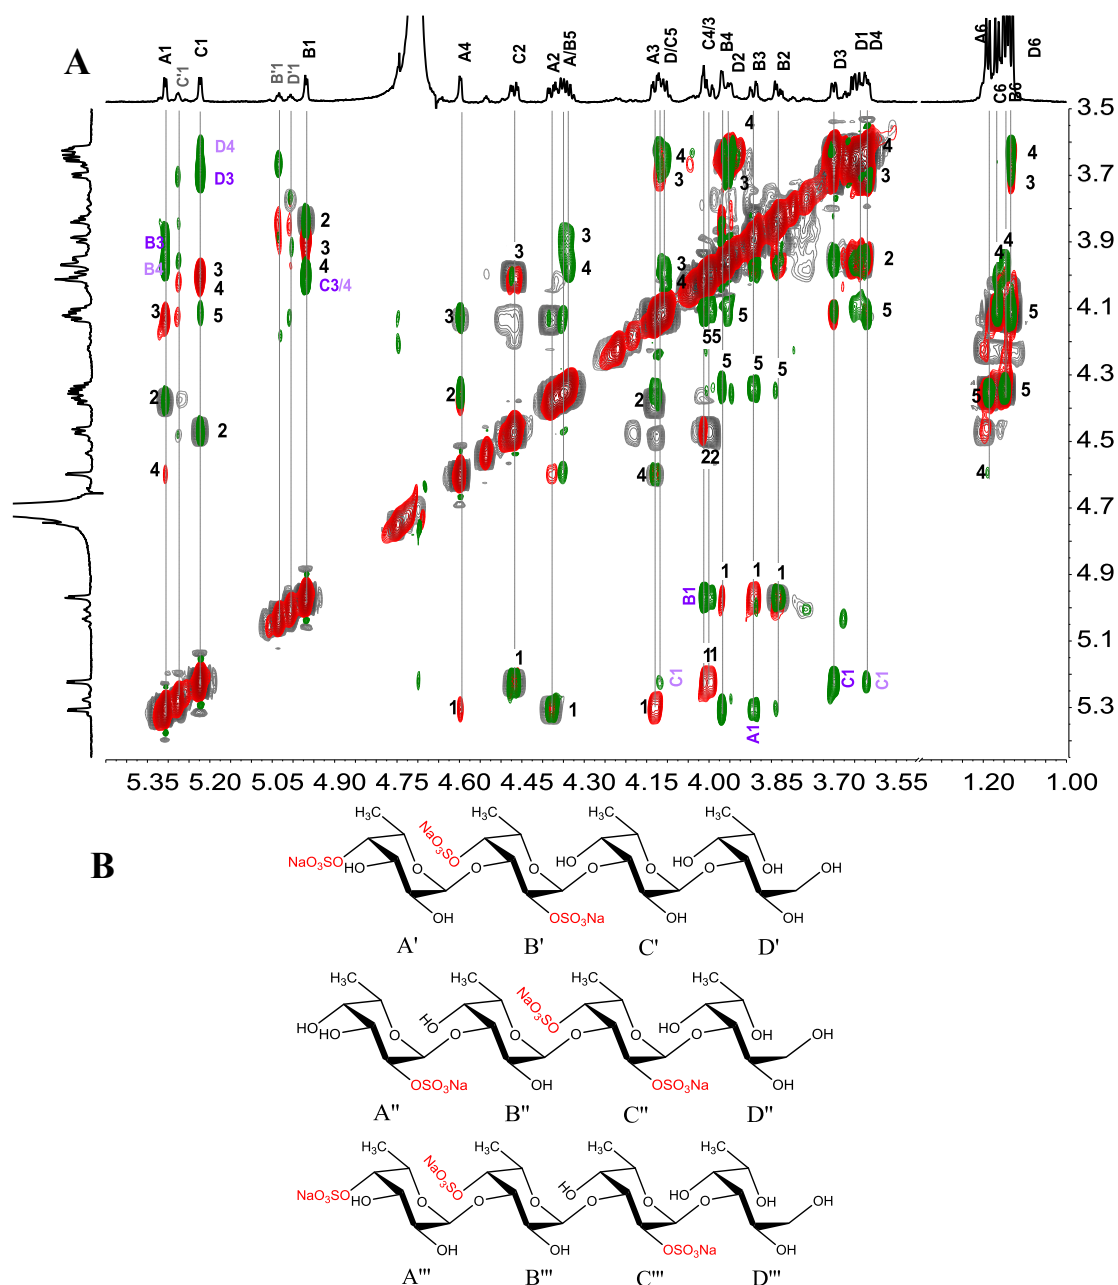

**Figure S7.** The overlapped spectra (A) of  $^1\text{H}$ - $^1\text{H}$  COSY (gray), TOCSY (red) and ROESY (green) of oligosaccharides **FV** and the structure of the minor components in **FV** (B).

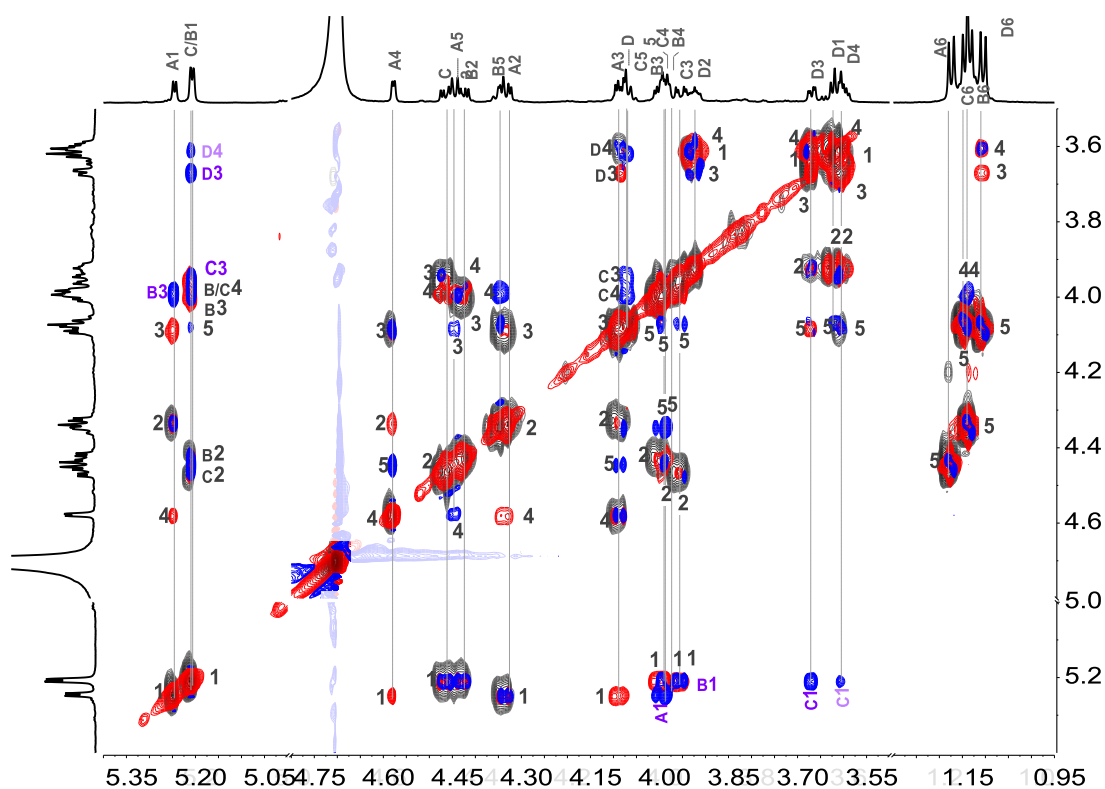

**Figure S8.** The overlapped spectra of  $^1\text{H}$ - $^1\text{H}$  COSY (gray), TOCSY (red) and ROESY (blue) of oligosaccharides **FVI**.

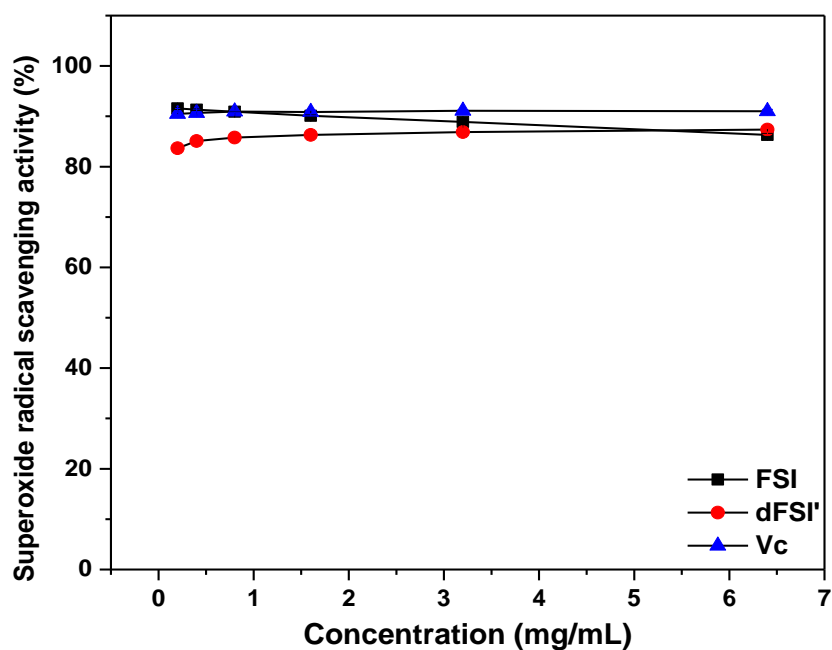

**Figure S9.** Scavenging effect of FSI, dFSI' and Vc on superoxide radicals at the concentration range of 0.2 - 6.4 mg/mL.

Shang, F., Mou, R., Zhang, Z., Gao, N., Lin, L., Li, Z., et al. (2018). Structural analysis and anticoagulant activities of three highly regular fucan sulfates as novel intrinsic factor Xase inhibitors. *Carbohydrate Polymers*, 195, 257-266.
